# Supplementary material for: Porous NiO architecture prepared with coordination polymer precursor as a high performance anode material for Li-ion batteries
Source: Royal Society of Chemistry journal article supplement (doi:10.1039/c5ra15452a), 2015-01-01
Supplement: c5ra15452a1.pdf [file c5ra15452a1.pdf]

## **Electronic Supplementary Information (ESI)**

### **Porous NiO architecture prepared with coordination polymer precursor as high performance anode material for Li-ion batteries**

An Guo, Yue Li, Kun Liu and Wen-Juan Ruan\*

*Department of Chemistry and Key Laboratory of Advanced Energy Materials Chemistry (Ministry of Education), Nankai University, Tianjin 300071, China. E-mail: wjruan@nankai.edu.cn; Tel: +86-22-23501717*

## Experimental details

### Materials and methods

1,4-benzenedicarboxylic acid (H<sub>2</sub>bdc), isonicotinic acid (Hina), Ni(NO<sub>3</sub>)<sub>2</sub>·6H<sub>2</sub>O, NaOH and the solvents used in CP preparation and electrochemical tests were all of analytical grade, and obtained from Aladdin Industrial Inc. (Shanghai, P.R. China). Acetylene black (>99.9%) and polyvinylidene fluoride (PVDF, >97%) and *N*-methyl-2-pyrrolidone (NMP, >99%) were supplied by J&K Scientific Ltd. (Beijing, P.R. China). Scanning electron microscope (SEM) images were taken with a JEOL JSM-7500F scanning electron microscope. Transmission electron microscopy (TEM) images were obtained with JEM-2010FEF transmission electron microscope operating at 200 kV. Powder X-ray diffraction (PXRD) was performed on a Rigaku D/max-2500 diffractometer with Cu K $\alpha$  radiation ( $\lambda = 0.15406$  nm) at 40 kV and 100 mA. N<sub>2</sub> adsorption-desorption isotherm measurement was operated on a V-Sorb 2800P surface area and pore size analyser, and the sample was pretreated at 150 °C for 180 min. Fourier transform infrared spectroscopy (FT-IR) was measured by a MAGNA-560 Fourier transform infrared spectrometer with nujol mull method. Elemental analysis (C, H, and N) was carried out on a Perkin-Elmer 240C analyzer. Thermogravimetric analysis (TGA) was performed on a Rigaku standard TG-DTA analyzer from ambient temperature to 700 °C with a heating rate of 10 °C min<sup>-1</sup> in the air, and an empty Al<sub>2</sub>O<sub>3</sub> crucible was used as the reference.

### Synthesis of porous NiO

In a typical procedure, 0.1 mmol H<sub>2</sub>bdc and 0.2 mmol Hina were dissolved in 10 mL of the mixture of H<sub>2</sub>O and DMF (1:1, v/v) containing 0.4 mmol NaOH. Under vigorous stirring, 0.4 mmol Ni(NO<sub>3</sub>)<sub>2</sub>·6H<sub>2</sub>O was added into this solution. The suspension was transferred to a Teflon-lined stainless steel autoclave and heated at 120 °C for 3 h. The pale green precipitate was separated by centrifugation, washed several times with ethanol, dried at 60 °C for 6 h and used as the precursor. The calcination process was carried out at 450 °C for 2 h in air to decompose the precursor to porous NiO.

### Electrochemical measurement

The electrochemical measurement of the as-prepared NiO sample was performed on a CR2016-type coin cell. A slurry was prepared by thoroughly mixing porous NiO, acetylene black (added to enhance the conductivity of the electrode) and PVDF at a weight ratio of 60:20:20 in NMP solution. This slurry was uniformly spread onto a Cu foil substrate and dried in a vacuum oven at 120 °C for 12 h to fabricate the working electrode, which contained active material of 1.9 mg cm<sup>-2</sup>. The test cells was assembled in an Ar-filled glove box using Li metal as the counter electrode, celgard 2300 membrane as the separator and 1 M LiPF<sub>6</sub> solution (ethylene carbonate:dimethyl carbonate = 1:1 in volume) as the electrolyte. The discharge-charge test was performed in the voltage range of 0.01–3.0 V at different current densities on battery testing system (C2001A, 5 V, 1 mA). Cyclic voltammetry (CV) was carried out on a LK3200 electrochemical workstation over the potential range of 0.01–3.0 V at a scan rate of 0.1 mV s<sup>-1</sup>.

**Table S1** The cycle performance of the NiO materials reported in recent years (2012–present)

| <b>Entry</b> | <b>Morphology</b>        | <b>Current density<br/>(mA g<sup>-1</sup>)</b> | <b>Cycle number</b> | <b>Capacity<br/>(mA h g<sup>-1</sup>)</b> | <b>Ref.</b> |
|--------------|--------------------------|------------------------------------------------|---------------------|-------------------------------------------|-------------|
| <b>1</b>     | Yolk-shell               | 700                                            | 150                 | 821–951                                   | 1           |
| <b>2</b>     | Fiber                    | 40                                             | 50                  | 638–696                                   | 2           |
| <b>3</b>     | Fiber                    | 80                                             | 100                 | 583–784                                   | 3           |
| <b>4</b>     | Nanotube                 | 200                                            | 100                 | 600–620                                   | 4           |
| <b>5</b>     | Nanowall array           | 500                                            | 50                  | 564–723                                   | 5           |
| <b>6</b>     | Microsphere              | 200                                            | 30                  | 380–975                                   | 6           |
| <b>7</b>     | Nanotube array           | 2000                                           | 10000               | 629–675                                   | 7           |
| <b>8</b>     | Spherical nanoparticle   | Not given                                      | 50                  | 144–145                                   | 8           |
| <b>9</b>     | Flower-like architecture | 359                                            | 40                  | ~1000                                     | This work   |

## References

- 1 S. H. Choi and Y. C. Kang, *ACS Appl. Mater. Interfaces*, 2014, **6**, 2312-2316.
- 2 B. Wang, J. L. Cheng, Y. P. Wu, D. Wang and D. N. He, *Electrochem. Commun.*, 2012, **23**, 5-8.
- 3 V. Aravindan, P. S. Kumar, J. Sundaramurthy, W. C. Ling, S. Ramakrishna and S. Madhavi, *J. Power Sources*, 2013, **227**, 284-290.
- 4 L. Liu, Y. Guo, Y. Wang, X. Yang, S. Wang and H. Guo, *Electrochim. Acta*, 2013, **114**, 42-47.
- 5 F. Cao, G. X. Pan, P. S. Tang and H. F. Chen, *Mater. Res. Bull.*, 2013, **48**, 1178-1183.
- 6 D. Xie, W. Yuan, Z. Dong, Q. Su, J. Zhang and G. Du, *Electrochim. Acta*, 2013, **92**, 87-92.
- 7 F. Cao, G. X. Pan, X. H. Xia, P. S. Tang and H. F. Chen, *J. Power Sources*, 2014, **264**, 161-167.
- 8 K. Prasanna, T. Subburaj, W. J. Lee and C. W. Lee, *Electrochim. Acta*, 2014, **137**, 273-279.
